# Supplementary material for: Inflammatory biomarkers in metastatic colorectal cancer: prognostic and predictive role beyond the first line setting
Source: PubMed Central journal article supplement (PMC5707080; doi:10.18632/oncotarget.21647), 2017-10-04
Supplement: oncotarget-08-96048-s001.pdf [file oncotarget-08-96048-s001.pdf]

# Inflammatory biomarkers in metastatic colorectal cancer: prognostic and predictive role beyond the first line setting

## SUPPLEMENTARY MATERIALS

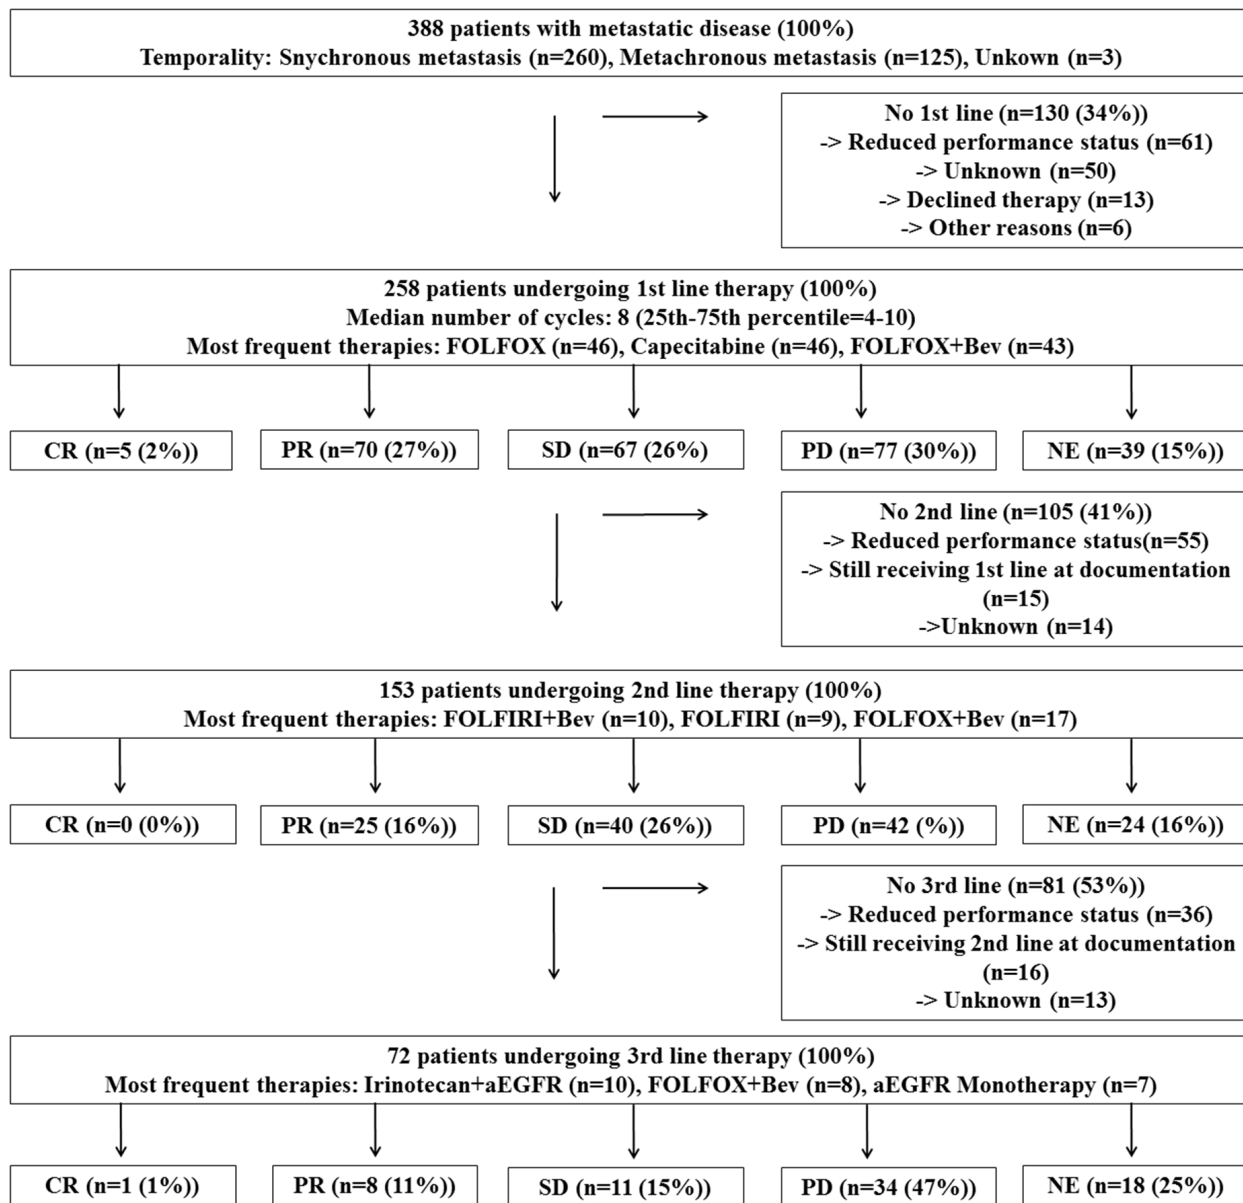

Supplementary Figure 1: Flowchart of the study population.

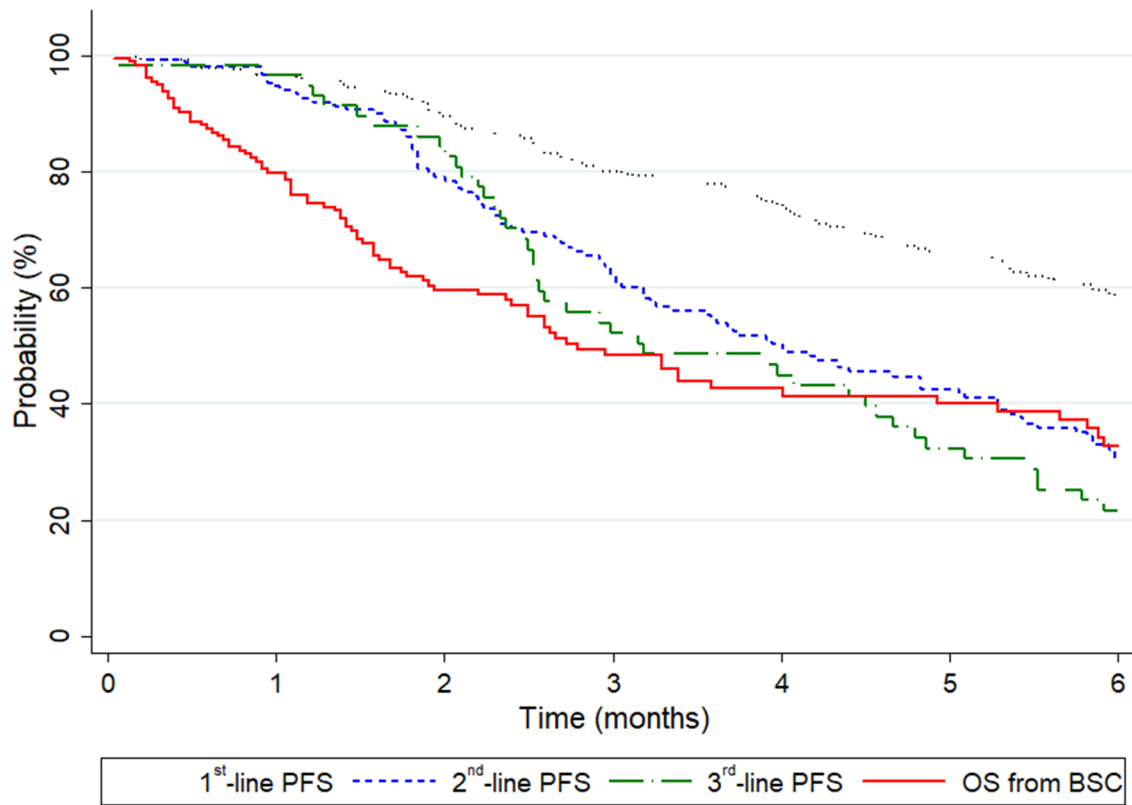

Supplementary Figure 2: Cumulative probability of progression free survival in 1<sup>st</sup>, 2<sup>nd</sup> and 3<sup>rd</sup> of palliative chemotherapy and overall survival in best supportive care.

Supplementary Table 1: Changes of inflammatory biomarkers over the first three treatment lines and BSC

|      | 1 <sup>st</sup> line (n=258)  |                               | 2 <sup>nd</sup> line (n=153)             |                                  | 3 <sup>rd</sup> line (n=72)   |                                          | BSC (n=183)                      |                                                        |                                          |                                  |
|------|-------------------------------|-------------------------------|------------------------------------------|----------------------------------|-------------------------------|------------------------------------------|----------------------------------|--------------------------------------------------------|------------------------------------------|----------------------------------|
|      | Median [25th-75th percentile] | Median [25th-75th percentile] | % relative change compared to first line | P for comparison with first line | Median [25th-75th percentile] | % relative change compared to first line | P for comparison with first line | Median [25 <sup>th</sup> -75 <sup>th</sup> percentile] | % relative change compared to first line | P for comparison with first line |
| NLR  | 3.9 [2.6-5.5]                 | 3.2 [2.2-5.4]                 | -18 %                                    | 0.691                            | 3.2 [1.9-5.9]                 | -19%                                     | 0.935                            | 5.2 [3.1-8.5]                                          | +32%                                     | 0.010                            |
| LMR  | 1.9 [1.5-2.8]                 | 1.8 [1.2-2.8]                 | -6%                                      | 0.145                            | 1.9 [1.3-3.0]                 | -2%                                      | 0.028                            | 1.2 [0.8-2.0]                                          | -36%                                     | <0.0001                          |
| PLR  | 212 [147-401]                 | 164 [123-245]                 | -23%                                     | 0.025                            | 171 [115-270]                 | -19%                                     | 0.559                            | 239 [155-359]                                          | +13%                                     | 0.215                            |
| CRP  | 11.7 [4-34]                   | 11 [4-34]                     | -9%                                      | 0.095                            | 13.7 [5.0-48]                 | +17%                                     | 0.013                            | 43 [12-96]                                             | +268%                                    | <0.0001                          |
| ALI* | 26.9 [15.1-42.0]              | 30.9 [19.8-51.5]              | +15%                                     | 0.345                            | 29.5 [12.4-56.9]              | +10%                                     | 0.934                            | N/A                                                    | N/A                                      | N/A                              |

Abbreviations: BSC – best supportive care, NLR – Neutrophil to lymphocyte ratio, LMR – Lymphocyte to monocyte ratio, PLR – Platelet to lymphocyte ratio, CRP – C reactive protein, ALI – Advanced lung cancer index.
